# Supplementary material
Source: publisher site journal article supplement (https://www.dovepress.com/article/568960)
Supplement: Supplementary file 1 [file 568960%20Revised%20Supplementary%20Material.docx]

Supplementary Table 1 Univariate and multivariate Cox regression analysis for predicting RFS

| Variables | Univariate analysis | | | | |  | Multivariate analysis | | | | |
| --- | --- | --- | --- | --- | --- | --- | --- | --- | --- | --- | --- |
|  | HR (95%CI) |  | *P* |  |  | HR (95%CI) |  | *P* |  |
| Gender |  |  |  |  |  |  |  |  |  |  |  |
| Male |  |  |  |  |  |  |  |  |  |  |  |
| Female |  | 0.870 (0.523 ~ 1.448) |  | 0.592 |  |  |  |  |  |  |  |
| AGE |  |  |  |  |  |  |  |  |  |  |  |
| ≤60 |  |  |  |  |  |  |  |  |  |  |  |
| ＞60 |  | 0.929 (0.610 ~ 1.416) |  | 0.733 |  |  |  |  |  |  |  |
| PRISm |  |  |  |  |  |  |  |  |  |  |  |
| No |  |  |  |  |  |  |  |  |  |  |  |
| Yes |  | 2.444 (1.594 ~ 3.748) |  | <.001 |  |  |  | 1.975 (1.217 ~ 3.206) |  | 0.006 |  |
| NLR |  |  |  |  |  |  |  |  |  |  |  |
| Low |  |  |  |  |  |  |  |  |  |  |  |
| High |  | 1.625 (1.002 ~ 2.637) |  | 0.049 |  |  |  | 1.189 (0.608 ~ 2.325) |  | 0.613 |  |
| PLR |  |  |  |  |  |  |  |  |  |  |  |
| Low |  |  |  |  |  |  |  |  |  |  |  |
| High |  | 0.836 (0.543 ~ 1.286) |  | 0.415 |  |  |  |  |  |  |  |
| LMR |  |  |  |  |  |  |  |  |  |  |  |
| Low |  |  |  |  |  |  |  |  |  |  |  |
| High |  | 0.535 (0.334 ~ 0.857) |  | 0.009 |  |  |  | 0.818 (0.395 ~ 1.695) |  | 0.589 |  |
| SII |  |  |  |  |  |  |  |  |  |  |  |
| Low |  |  |  |  |  |  |  |  |  |  |  |
| High |  | 0.847 (0.552 ~ 1.300) |  | 0.447 |  |  |  |  |  |  |  |
| SIRI |  |  |  |  |  |  |  |  |  |  |  |
| Low |  |  |  |  |  |  |  |  |  |  |  |
| High |  | 1.528 (0.965 ~ 2.419) |  | 0.071 |  |  |  |  |  |  |  |
| SPC |  |  |  |  |  |  |  |  |  |  |  |
| No |  |  |  |  |  |  |  |  |  |  |  |
| Yes |  | 1.752 (1.030 ~ 2.979) |  | 0.039 |  |  |  | 1.166 (0.649 ~ 2.098) |  | 0.607 |  |
| cT |  |  |  |  |  |  |  |  |  |  |  |
| 1 |  |  |  |  |  |  |  |  |  |  |  |
| 2 |  | 1.506 (0.584 ~ 3.882) |  | 0.397 |  |  |  |  |  |  |  |
| 3 |  | 1.266 (0.492 ~ 3.259) |  | 0.625 |  |  |  |  |  |  |  |
| 4 |  | 1.433 (0.540 ~ 3.803) |  | 0.469 |  |  |  |  |  |  |  |
| cN |  |  |  |  |  |  |  |  |  |  |  |
| 0 |  |  |  |  |  |  |  |  |  |  |  |
| 1 |  | 1.936 (0.962 ~ 3.898) |  | 0.064 |  |  |  |  |  |  |  |
| 2 |  | 1.725 (0.896 ~ 3.318) |  | 0.103 |  |  |  |  |  |  |  |
| 3 |  | 1.362 (0.643 ~ 2.886) |  | 0.419 |  |  |  |  |  |  |  |
| ypT |  |  |  |  |  |  |  |  |  |  |  |
| 0 |  |  |  |  |  |  |  |  |  |  |  |
| 1 |  | 1.627 (0.510 ~ 5.188) |  | 0.411 |  |  |  |  |  |  |  |
| 2 |  | 2.002 (0.664 ~ 6.036) |  | 0.218 |  |  |  |  |  |  |  |
| 3 |  | 2.577 (0.932 ~ 7.129) |  | 0.068 |  |  |  |  |  |  |  |
| 4 |  | 2.475 (0.698 ~ 8.781) |  | 0.161 |  |  |  |  |  |  |  |
| ypN |  |  |  |  |  |  |  |  |  |  |  |
| 0 |  |  |  |  |  |  |  |  |  |  |  |
| 1 |  | 2.563 (1.487 ~ 4.416) |  | <.001 |  |  |  | 2.372 (1.342 ~ 4.194) |  | 0.003 |  |
| 2 |  | 3.554 (2.056 ~ 6.141) |  | <.001 |  |  |  | 3.433 (1.930 ~ 6.105) |  | <.001 |  |
| 3 |  | 2.909 (1.189 ~ 7.118) |  | 0.019 |  |  |  | 3.797 (1.470 ~ 9.808) |  | 0.006 |  |
| TRG |  |  |  |  |  |  |  |  |  |  |  |
| pCR、MPR |  |  |  |  |  |  |  |  |  |  |  |
| pPR、pNR |  | 1.545 (0.985 ~ 2.423) |  | 0.058 |  |  |  |  |  |  |  |
| Method |  |  |  |  |  |  |  |  |  |  |  |
| nICT |  |  |  |  |  |  |  |  |  |  |  |
| nCRT |  | 3.124 (1.177 ~ 8.294) |  | 0.022 |  |  |  | 3.094 (1.092 ~ 8.766) |  | 0.034 |  |
| nCT |  | 2.126 (0.850 ~ 5.315) |  | 0.107 |  |  |  | 1.985 (0.786 ~ 5.015) |  | 0.147 |  |
| FEF25 |  | 0.935 (0.819 ~ 1.066) |  | 0.314 |  |  |  |  |  |  |  |
| FEF50 |  | 0.803 (0.672 ~ 0.961) |  | 0.017 |  |  |  | 0.769 (0.629 ~ 0.942) |  | 0.011 |  |
| FEF75 |  | 0.697 (0.459 ~ 1.059) |  | 0.091 |  |  |  |  |  |  |  |
| MMV |  | 1.011 (0.997 ~ 1.026) |  | 0.127 |  |  |  |  |  |  |  |
| Abbreviations: HR: Hazards Ratio, CI: Confidence Interval; pCR, pathological complete response; MPR,major pathological response ;pPR, partial pathological response, pNR, pathological non-response; PRISm: preserved ratio impaired spirometry ; nICT: neoadjuvant immunochemotherapy; nCRT: neoadjuvant chemoradiotherapy; nCT : neoadjuvant chemotherapy; cT: clinical T stage; cN: clinical N stage ; ypT: after neoadjuvant therapy pathological T stage; ypN: after neoadjuvant therapy pathological N stage; TRG: tumor regression grade; SPC: severe postoperative complication; MMV, maximum minute ventilation; NLR, neutrophil-to-lymphocyte ratio; PLR, platelet-to-lymphocyte ratio; LMR, lymphocyte-to-monocyte ratio; SII, systemic immune-inflammation index; SIRI: systemic inflammation response index; MMV: maximal minute ventilation; FEF25: forced expiratory flow at 25% of FVC; FEF50: forced expiratory flow at 50% of FVC; FEF75: forced expiratory flow at 75% of FVC. | | | | | | | | | | | |


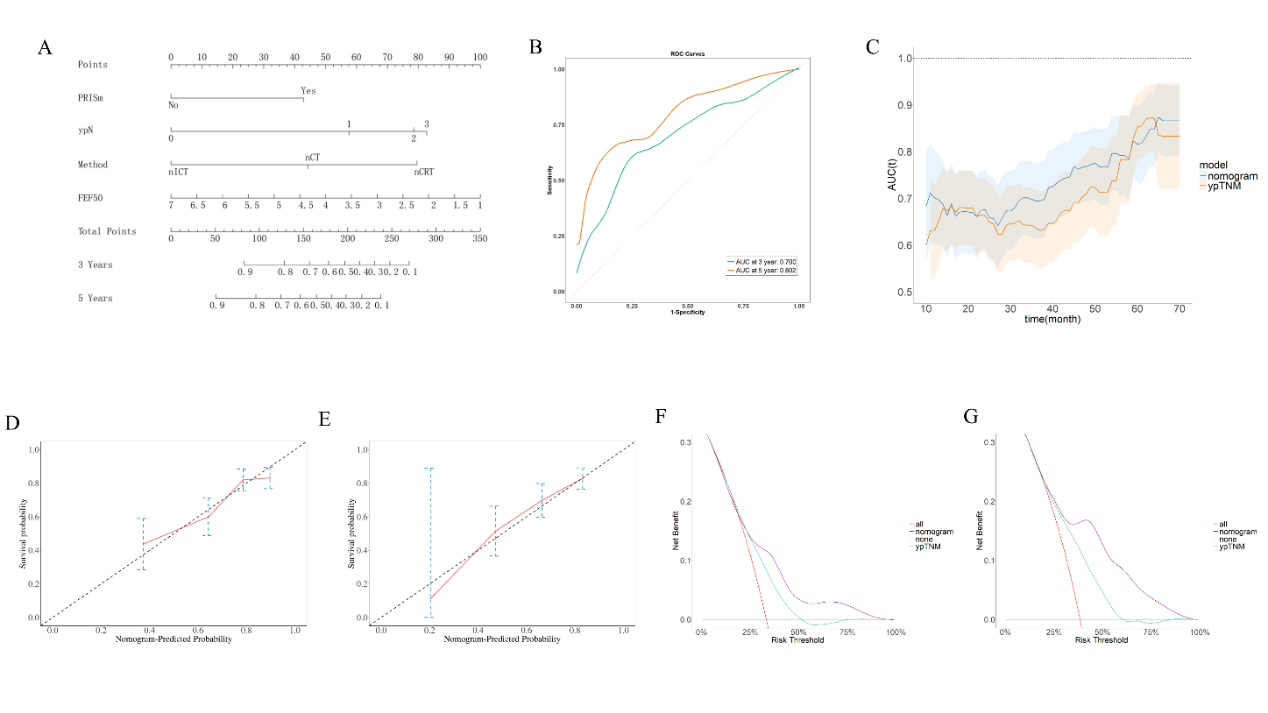


Supplementary Figure 1 Nomogram for predicting RFS (A). ROC curves of the prognostic model at 3- and 5-year follow-up (B) and corresponding time-dependent AUC curves（C）Validation results confirmed model robustness, with both calibrations (D-E) and DCA curves (F-G) showing optimal clinical benefit.
